# Supplementary material for: Exposing active sites in zeolites with fluoropyridines as NMR probe molecules
Source: Royal Society of Chemistry journal article supplement (doi:10.1039/d5ay00507h), 2025-01-01
Supplement: d5ay00507h1.pdf [file d5ay00507h1.pdf]

## Supporting Information

### Exposing active sites in zeolites with fluoropyridines as NMR probe molecules

Joseph Hurd<sup>1</sup>, Yujie Ma<sup>2</sup>, Paolo Cerreia Vioglio<sup>3</sup>, Run Zou<sup>1</sup>, Dinu Iuga<sup>4</sup>, Sihai Yang<sup>2,5</sup>, Xiaolei Fan<sup>1,6</sup>, Daniel Lee<sup>1\*</sup>

- 
- 1 J. Hurd, R. Zou, D. Lee, X. Fan  
Department of Chemical Engineering  
The University of Manchester  
Oxford Road, Manchester M13 9PL (United Kingdom)  
E-mail: [daniel.lee@manchester.ac.uk](mailto:daniel.lee@manchester.ac.uk)
  - 2 Y. Ma, S. Yang  
Department of Chemistry  
The University of Manchester  
Oxford Road, Manchester M13 9PL (United Kingdom)
  - 3 P. Cerreia Vioglio  
Sir Peter Mansfield Imaging Centre  
The University of Nottingham  
Nottingham NG7 2RD (United Kingdom)
  - 4 D. Iuga  
Department of Physics  
The University of Warwick  
Coventry CV4 7AL (United Kingdom)
  - 5 S. Yang  
College of Chemistry and Molecular Engineering, BNLM  
Peking University  
202 Chengfu Road, Haidian, Beijing 100871 (China)
  - 6 X. Fan  
Ningbo China Beacons of Excellence Research and Innovation Institute  
University of Nottingham Ningbo China  
211 Xingguang Road, Ningbo 315048 (China)

## Table of Contents

|                               |    |
|-------------------------------|----|
| Experimental Procedures ..... | 2  |
| Supplementary Results.....    | 7  |
| References.....               | 19 |

## Experimental Procedures

### Materials

$\gamma$ -Alumina, Scientific Laboratory Supplies Ltd

Zeolite HZSM-5 (SAR:40, CBV 8014), Zeolyst International

Zeolite HY (SAR: 2.6, CBV300), Zeolyst International

2-Fluoropyridine, Fluorochem

3-Fluoropyridine, Fluorochem

Silicalite-1 synthesised in-house following the standard method<sup>1</sup>

### Dosing Procedure

The zeolite samples were packed into 4 mm o.d. zirconia rotors and placed inside a 100 cm<sup>3</sup> round-bottomed flask inside open glass vials. The samples were heated to 150 °C using an oil bath under vacuum for 5 h to remove adsorbed water from the zeolites. The samples were kept in the degassed vial and, once the vacuum pump was turned off, the sealed, 0.5 cm<sup>3</sup> of 2- or 3-fluoropyridine was added to the evacuated and sealed round-bottomed flask for the vapours to diffuse into the zeolite samples for 8 h.

### Solid-State NMR

The moderate-field solid-state (ss)NMR spectra were obtained at 9.4 T using a 400 MHz (<sup>1</sup>H Larmor frequency) spectrometer with a Bruker Avance III console and a 4 mm HFX Bruker MAS probe using 4 mm ZrO<sub>2</sub> rotors with Kel-F rotor caps under ambient conditions as well as with cooling to 260 K and with variable MAS frequencies.

The high-field spectra were obtained at both 16.4 and 20.0 T, (700 and 850 MHz respective <sup>1</sup>H Larmor frequencies), on Bruker AVANCE NEO spectrometers. The spectrometers were equipped with a Phoenix 1.6 mm HFX MAS probe in <sup>1</sup>H, <sup>19</sup>F, and <sup>27</sup>Al configuration for 20.0 T measurements and a Bruker 1.3 mm HX MAS probe in <sup>1</sup>H and <sup>27</sup>Al configuration for 16.4 T measurements. BCUs were used to cool the probes to 260 K. Zeolites and fluoropyridine-dosed zeolites were removed from the 4 mm rotors in which they were dosed in a fume cupboard and packed into 1.3 and 1.6 mm ZrO<sub>2</sub> rotors and were sealed with Vespel caps.

Low temperature and dynamic nuclear polarisation (DNP)-enhanced solid-state NMR spectra were recorded using a Bruker 14.1 T (600 MHz <sup>1</sup>H Larmor frequency) AVANCE III HD spectrometer equipped with a 3.2 mm HX LTMAS probe in <sup>19</sup>F/<sup>27</sup>Al or <sup>1</sup>H/<sup>15</sup>N configuration for appropriate experiments. Zeolites

and fluoropyridine-dosed zeolites were removed from the 4 mm rotors in which they were dosed in a fume cupboard and packed into 3.2 mm ZrO<sub>2</sub> rotors and were sealed with Vespel rotor caps. For the DNP experiments, 40 mg of the 3FP@HY sample was impregnated in a fume cupboard with 60 µL of “DNP solution” (11 mM TEKPol in 1,1,2,2-tetrachloroethane).

Chemical shifts were externally referenced to liquid ammonia for <sup>15</sup>N, 1 M Al(NO<sub>3</sub>)<sub>3</sub> aqueous solution for <sup>27</sup>Al, CFC<sub>3</sub> for <sup>19</sup>F, and TMS for <sup>1</sup>H. Spectra were analysed in Topspin 4.1.4 using the SOLids Lineshape Analysis tool version 2.2.4 (SOLA). Further experimental details may be found in the below Tables S1-S6.

For the calibration of the Hartmann-Hahn conditions for <sup>19</sup>F-<sup>27</sup>Al CP MAS NMR experiments, AlF<sub>3</sub> was used to establish the matching conditions as it has a high abundance of both isotopes. <sup>1</sup>H-<sup>27</sup>Al CP MAS NMR experiments were calibrated directly on zeolite HY as the low SAR enabled low power central-transition selective pulses to be calibrated and subsequently <sup>1</sup>H powers to be calculated and optimized.

Chemical shift anisotropy (CSA) is described using the Haeberlen convention, where  $\delta_{iso}$  is the isotropic chemical shift (units of ppm),  $\delta_{CSA}$  is the reduced anisotropy (units of ppm), and  $\eta(CSA)$  is the (dimensionless) asymmetry parameter. The principal components are defined as

$$|\delta_{zz} - \delta_{iso}| \geq |\delta_{xx} - \delta_{iso}| \geq |\delta_{yy} - \delta_{iso}|$$

$\delta_{CSA}$  is defined as

$$\delta_{CSA} = \delta_{zz} - \delta_{iso}$$

and  $\eta$  is defined as

$$\eta = \frac{\delta_{xx} - \delta_{yy}}{\delta_{zz} - \delta_{iso}}$$

Table S1. <sup>27</sup>Al direct excitation MAS NMR experimental parameters.

| Experiment                               | <sup>27</sup> Al one-pulse | <sup>27</sup> Al one-pulse | <sup>27</sup> Al one-pulse |
|------------------------------------------|----------------------------|----------------------------|----------------------------|
| Figure(s)                                | Fig 4, S7                  | Fig S3 and S9              | Fig S10                    |
| $B_0$ (T)                                | 14.1                       | 9.4                        | 20.0                       |
| MAS (kHz)                                | 5                          | 8                          | 33                         |
| Recycle delay (s)                        | 0.5                        | 2.0                        | 0.5 (HY), 1.0 (HZSM-5)     |
| Number of transients                     | 128                        | 2048                       | 2048 (HY), 1024 (HZSM-5)   |
| <sup>27</sup> Al RF field strength (kHz) | ~8                         | ~70                        | ~70                        |
| <sup>27</sup> Al RF pulse duration (µs)  | 1                          | 0.5                        | 0.5                        |

Table S2. {X-}<sup>27</sup>Al CP MAS NMR experimental parameters.

| Experiment                                  | { <sup>19</sup> F-} <sup>27</sup> Al CP MAS |                                      | <sup>1</sup> H– <sup>27</sup> Al HETCOR |
|---------------------------------------------|---------------------------------------------|--------------------------------------|-----------------------------------------|
| Figure(s)                                   | Fig 4                                       | Fig S6                               | Fig S11                                 |
| <i>B</i> <sub>0</sub> (T)                   | 14.1                                        | 20.0                                 | 16.4                                    |
| MAS (kHz)                                   | 5                                           | 33                                   | 50                                      |
| Recycle delay (s)                           | 9.3 (HY), 13.4 (HZSM-5)                     | 2 (HZSM-5), 5 (AlF <sub>3</sub> )    | 0.425                                   |
| Number of transients                        | 3072                                        | 4096 (HZSM-5), 4 (AlF <sub>3</sub> ) | 512                                     |
| Indirect dimension complex increments       | -                                           | -                                    | 256                                     |
| <sup>19</sup> F RF field strength (kHz)     | 100                                         | 74                                   | -                                       |
| <sup>19</sup> F CP RF field strength (kHz)  | 29                                          | 16                                   | -                                       |
| <sup>1</sup> H RF field strength (kHz)      | -                                           | -                                    | 150                                     |
| <sup>1</sup> H CP RF field strength (kHz)   | -                                           | -                                    | 84                                      |
| <sup>27</sup> Al CP RF field strength (kHz) | ~8                                          | ~6                                   | 11                                      |
| CP spin lock duration (μs)                  | 2000 (Square)                               | 600 (Square)                         | 700 (Square)                            |

Table S3. <sup>19</sup>F direct excitation MAS NMR experimental parameters.

| Experiment                              | <sup>19</sup> F Hahn-echo                            |
|-----------------------------------------|------------------------------------------------------|
| Figure(s)                               | Fig 2, S2a, S2c                                      |
| <i>B</i> <sub>0</sub> (T)               | 9.4                                                  |
| MAS (kHz)                               | 8 (HY, HZSM-5), 12 (Silicalite-1 and γ-Alumina)      |
| Recycle delay (s)                       | 5                                                    |
| Number of transients                    | 16 (Silicalite-1), 80 (γ-Alumina), 2048 (HY, HZSM-5) |
| <sup>19</sup> F RF field strength (kHz) | 71                                                   |

Table S4.  $\{^1\text{H}\}\text{-}^{19}\text{F}$  CP MAS NMR experimental parameters.

| Experiment                                 | $\{^1\text{H}\}\text{-}^{19}\text{F}$ CP MAS                      |                        |
|--------------------------------------------|-------------------------------------------------------------------|------------------------|
| Figure(s)                                  | Fig 2, S1, S2                                                     | Fig 3                  |
| $B_0$ (T)                                  | 9.4                                                               | 20.0                   |
| MAS (kHz)                                  | 8                                                                 | 33                     |
| Recycle delay (s)                          | 1.5 (RT)                                                          | 4.7 (HY), 2.0 (HZSM-5) |
| Number of transients                       | 128 (2FP@HZSM-5, 3FP 260K spectra), 8192 (3FP RT spectra, 2FP@HY) | 4096                   |
| $^1\text{H}$ RF field strength (kHz)       | 100                                                               | 71                     |
| $^{19}\text{F}$ CP RF field strength (kHz) | ~52                                                               | 74                     |
| $^1\text{H}$ CP RF field strength (kHz)    | ~66                                                               | 46                     |
| CP spin lock duration ( $\mu\text{s}$ )    | 1250 (Ramp 70-100)                                                | 500 (Ramp 80-100)      |

Table S5. DNP-enhanced  $\{^1\text{H}\}\text{-}^{15}\text{N}$  CP MAS NMR experimental parameters.

| Experiment                                 | $\{^1\text{H}\}\text{-}^{15}\text{N}$ CP MAS NMR |
|--------------------------------------------|--------------------------------------------------|
| Figure(s)                                  | Fig 4                                            |
| $B_0$ (T)                                  | 14.1                                             |
| MAS (kHz)                                  | 8                                                |
| Recycle delay (s)                          | 5                                                |
| Number of transients                       | 15360                                            |
| $^1\text{H}$ RF field strength (kHz)       | 100                                              |
| $^1\text{H}$ CP RF field strength (kHz)    | 76                                               |
| $^{15}\text{N}$ CP RF field strength (kHz) | ~64                                              |
| CP spin lock duration ( $\mu\text{s}$ )    | 800 (Ramp 90-100)                                |

Table S6.  $^1\text{H}$  direct excitation MAS NMR experimental parameters.

| Experiment                               | $^1\text{H}$ Hahn-echo | $^1\text{H}$ - $^1\text{H}$ DQ-SQ dipolar correlation |
|------------------------------------------|------------------------|-------------------------------------------------------|
| Figure(s)                                | Fig S4                 | Fig S5                                                |
| $B_0$ (T)                                | 20.0                   | 16.4                                                  |
| MAS (kHz)                                | 33                     | 33.3                                                  |
| Recycle delay (s)                        | 10                     | 0.425                                                 |
| Number of transients                     | 16                     | 1024                                                  |
| Indirect dimension<br>complex increments | -                      | 64                                                    |
| $^1\text{H}$ RF field strength<br>(kHz)  | 71                     | 150                                                   |

**FT-IR**

Zeolites HY and HZSM-5 and the 2- and 3-fluoropyridine dosed derivatives have been tested using a Bruker Vertex 70 benchtop FT-IR spectrometer with 64 scans between wavenumbers ( $\nu$ ) 4000-250  $\text{cm}^{-1}$  with a resolution of 1.29  $\text{cm}^{-1}$ . A background was taken and subtracted from the final spectra. Pyridine is commonly used as a probe molecule for IR studies of active sites in zeolites since the resulting spectra can be used to discriminate between protonated pyridine (Py- $\text{H}^+$ ;  $\nu_{8a} = 1640 \text{ cm}^{-1}$ ,  $\nu_{19b} = 1545 \text{ cm}^{-1}$ ), pyridine adsorbed at a weak BAS through H-bonding (Py-B;  $\nu_{8a} = 1595 \text{ cm}^{-1}$ ,  $\nu_{19b} = 1445 \text{ cm}^{-1}$ ), and pyridine adsorbed at a LAS (Py-L;  $\nu_{8a} = 1600\text{--}1630 \text{ cm}^{-1}$ ,  $\nu_{19b} = 1450 \text{ cm}^{-1}$ ).<sup>2,3</sup> Since  $\nu_{8a}$  and  $\nu_{19b}$  modes are associated with motions of the aromatic ring<sup>4</sup>, it is expected that these modes would appear at very similar wavenumbers for the fluoropyridines used here.<sup>4</sup>

## Supplementary Results

Table S7. Assigned FT-IR spectrum for the peaks shown in Figure 1.

|       | Wavenumber $\text{cm}^{-1}$ | Assignment         |
|-------|-----------------------------|--------------------|
| HY    | 1565                        | 3FP-H <sup>+</sup> |
|       | 1547                        | 2FP-H <sup>+</sup> |
|       | 1440                        | 2FP-L              |
|       | 1434                        | 3FP-L              |
| ZSM-5 | 1571                        | 3FP-H <sup>+</sup> |
|       | 1543                        | 2FP-H <sup>+</sup> |
|       | 1439                        | 2FP-L              |
|       | 1433                        | 3FP-L              |

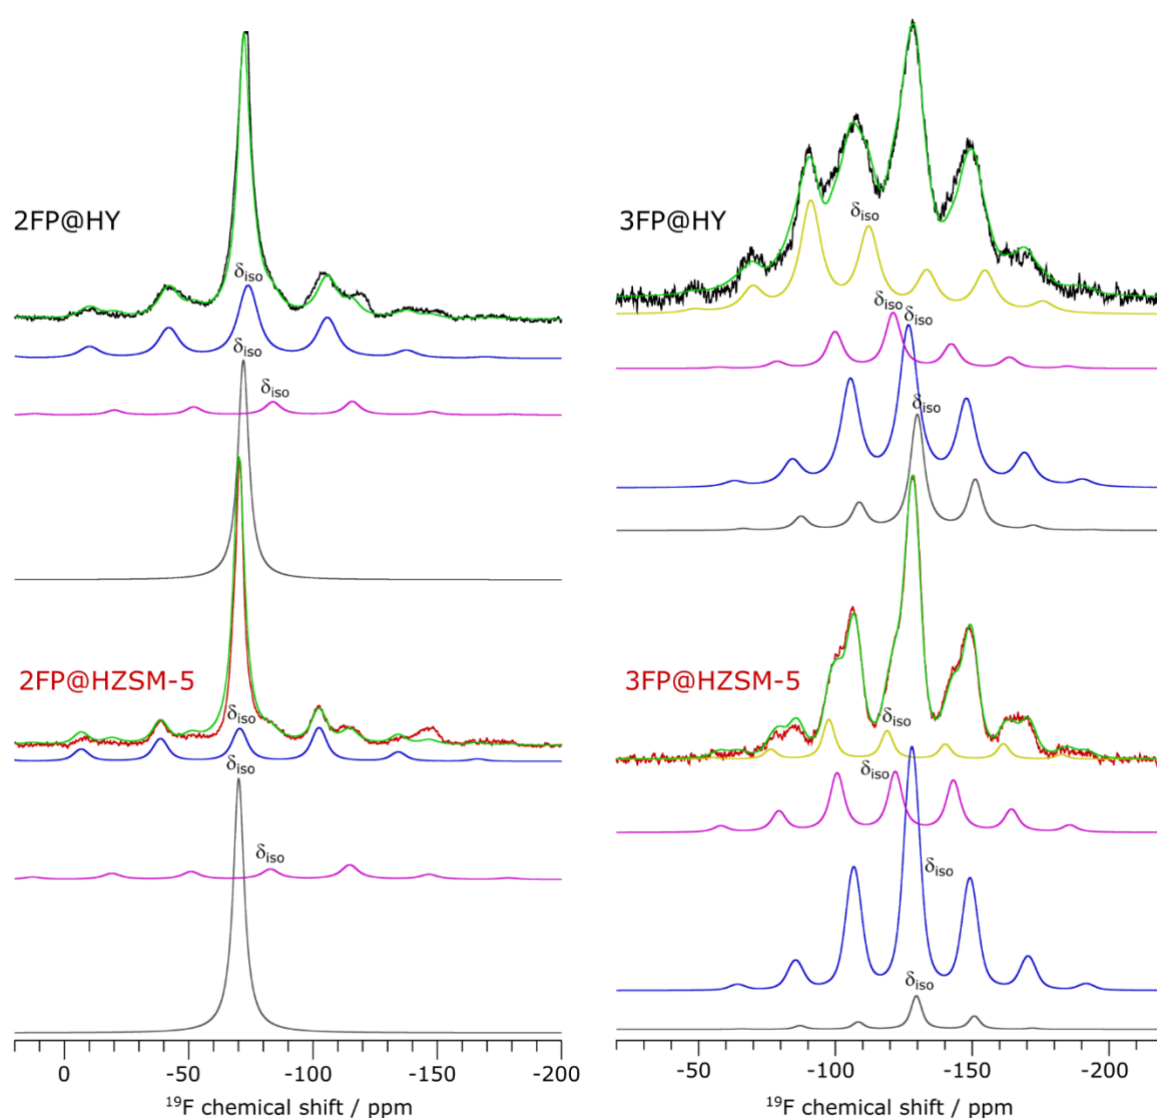

Figure S1. 9.4 T  $\{^1\text{H}\}\text{-}^{19}\text{F}$  CP MAS NMR spectra of 2FP-dosed zeolites HY (black) and HZSM-5 (red) acquired under ambient temperatures (left) and 3FP-dosed zeolites HY (black) and HZSM-5 (red) at 260 K (right), recorded with a MAS frequency of 8 kHz with associated spectral deconvolutions (purple, blue, yellow and grey) and the envelope (green).

Table S8. Fitting parameters for the deconvoluted resonances from Figure S1. LB = Lorentzian broadening, GB = Gaussian broadening, and Int. = relative integral. In the Haeberlen convention of the CSA tensor,  $\delta_{iso}$  is the isotropic chemical shift (units of ppm),  $\delta_{CSA}$  is the reduced anisotropy (units of ppm), and  $\eta(CSA)$  is the asymmetry parameter.

|                | Site        | $\delta_{iso}$ | $\delta_{CSA}$ | $\eta(CSA)$ | LB (kHz) | GB (kHz) | Int. |
|----------------|-------------|----------------|----------------|-------------|----------|----------|------|
| 2FP@<br>HY     | Physisorbed | -72            | 0              | -           | 2.0      | 0        | 0.79 |
|                | 2FP-B       | -74            | 70             | 0.7         | 3.0      | 1.5      | 1    |
|                | 2FP-L       | -84            | 90             | 0.6         | 2.6      | 0.8      | 0.22 |
| 2FP@<br>ZSM-5  | Physisorbed | -70            | 0              | -           | 2.0      | 0        | 1.78 |
|                | 2FP-B       | -71            | 90             | 0.7         | 2.0      | 1.4      | 1    |
|                | 2FP-L       | -83            | 105            | 0.6         | 3.0      | 0.6      | 0.49 |
| 3FP@<br>HY     | 3FP-L       | -112           | -66            | 0.2         | 3.2      | 0.9      | 0.85 |
|                | 3FP-B/L     | -121           | -50            | 0.6         | 2.0      | 1.2      | 0.26 |
|                | 3FP-B       | -127           | -50            | 0.8         | 2.7      | 1.1      | 1    |
|                | Physisorbed | -130           | 43             | 0.0         | 2.0      | 0.8      | 0.38 |
| 3FP@<br>HZSM-5 | 3FP-L       | -118           | -68            | 0.3         | 1.5      | 1.0      | 0.17 |
|                | 3FP-B       | -122           | -59            | 0.9         | 1.9      | 1.0      | 0.42 |
|                | 3FP-B       | -128           | -45            | 0.9         | 1.2      | 1.9      | 1    |
|                | Physisorbed | -130           | 42             | 0.0         | 1.3      | 1.0      | 0.07 |



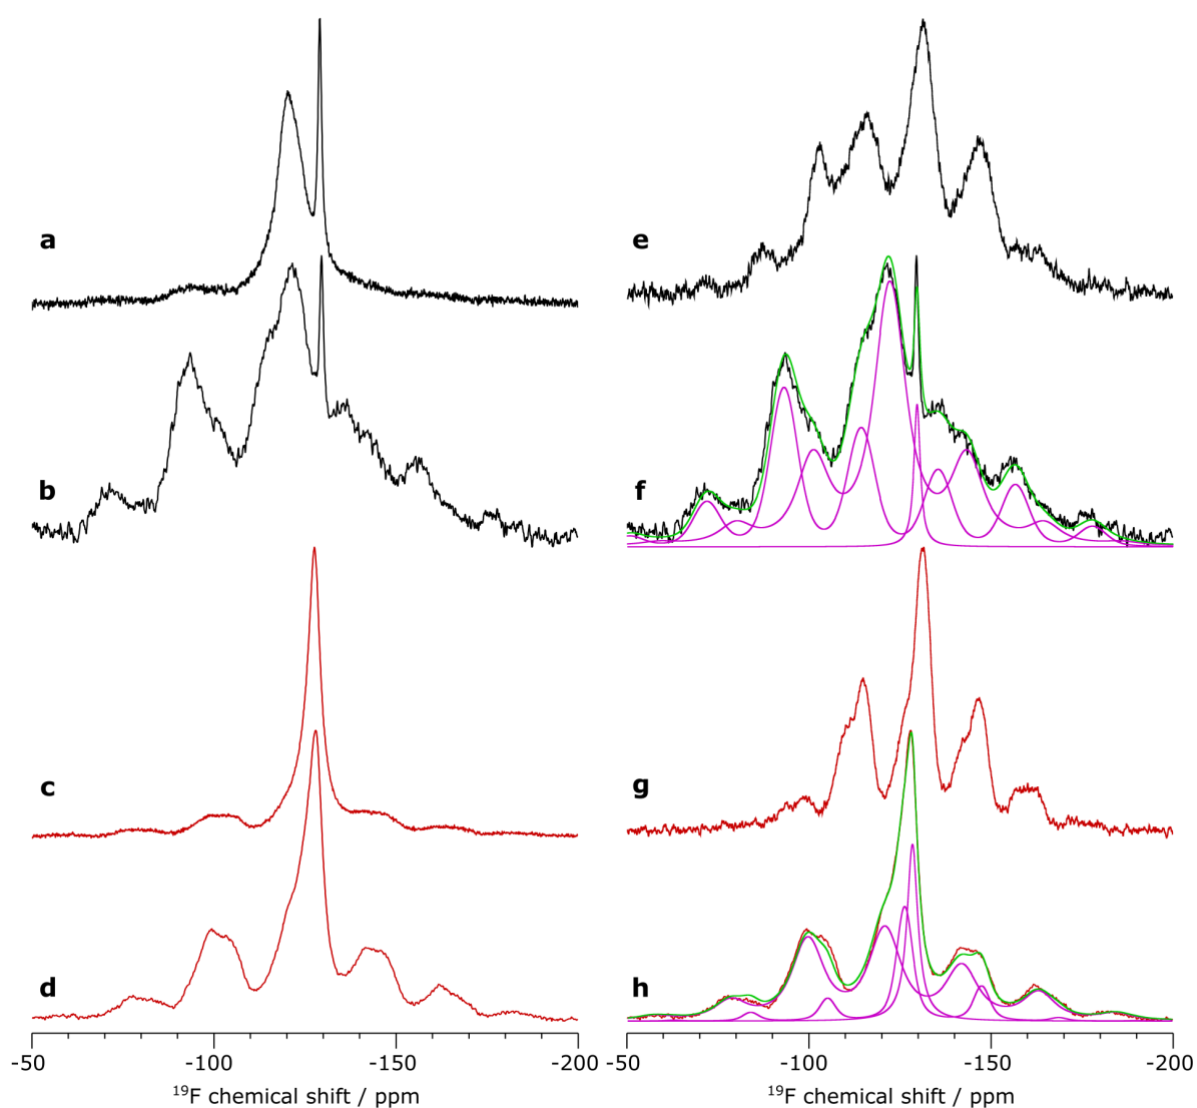

Figure S2. LHS:  $^{19}\text{F}$  direct excitation (a, c) and  $\{^1\text{H}\}\text{-}^{19}\text{F}$  CP (b, d) MAS NMR spectra recorded with  $^1\text{H}$  decoupling at 9.4 T, under ambient conditions, and with 8 kHz MAS frequency, of 3FP@HY (a, b, black) and 3FP@HZSM-5 (c, d, red). RHS: Deconvolutions (purple) and the envelope (green) of the  $\{^1\text{H}\}\text{-}^{19}\text{F}$  CP MAS NMR spectra (from b, deconvolution shown in f and from d, deconvolution shown in h).  $\{^1\text{H}\}\text{-}^{19}\text{F}$  CP MAS NMR spectra of 3FP@HY (e, black) and 3FP@HZSM-5 (g, red) recorded with  $^1\text{H}$  decoupling at 9.4 T, with cooling to 260 K are shown for comparison.

Table S9. Fitting parameters for the deconvoluted resonances from Figure S2. LB = Lorentzian broadening, GB = Gaussian broadening, and Int. = relative integral. In the Haeberlen convention of the CSA tensor,  $\delta_{iso}$  is the isotropic chemical shift (units of ppm),  $\delta_{CSA}$  is the reduced anisotropy (units of ppm), and  $\eta(CSA)$  is the asymmetry parameter. Note that the fitted CSA parameters do not match those of Table S8 owing to the increased dynamics at the higher temperatures used to record the corresponding spectra.

|                | Site        | $\delta_{iso}$ | $\delta_{CSA}$ | $\eta(CSA)$ | LB (kHz) | GB (kHz) | Int. |
|----------------|-------------|----------------|----------------|-------------|----------|----------|------|
| 3FP@<br>HY     | 3FP-L       | -114           | -67            | 0.5         | 1.1      | 2.8      | 0.74 |
|                | 3FP-B       | -122           | -37            | 1           | 3.2      | 1.6      | 1    |
|                | Physisorbed | -130           | 0              | -           | 0.8      | 0        | 0.07 |
| 3FP@<br>HZSM-5 | 3FP-L       | -121           | -56            | 0.7         | 3.2      | 1.6      | 1    |
|                | 3FP-B       | -126           | 36             | 0.4         | 1.1      | 1.3      | 0.31 |
|                | Physisorbed | -128           | 0              | -           | 1.4      | 0        | 0.24 |

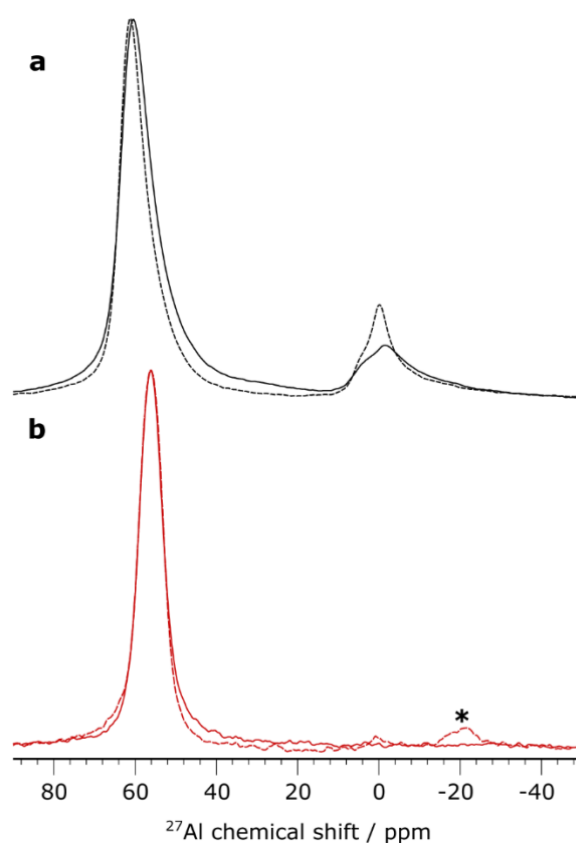

Figure S3.  $^{27}\text{Al}$  direct excitation MAS NMR spectra of zeolites (a) HY (black) and (b) HZSM-5 (red) dosed with 3FP (solid line) and undosed (dashed lines) with  $^1\text{H}$  decoupling recorded at 9.4 T with 8 kHz MAS frequency. Asterisks (\*) denote spinning side bands.

Table S10. Fitting parameters for the deconvoluted resonances from Figure 3. LB = Lorentzian broadening, GB = Gaussian broadening, and Int. = relative integral. In the Haeberlen convention of the CSA tensor,  $\delta_{iso}$  is the isotropic chemical shift (units of ppm),  $\delta_{CSA}$  is the reduced anisotropy (units of ppm), and  $\eta(CSA)$  is the asymmetry parameter.

|            | Site              | $\delta_{iso}$ | LB (kHz) | GB (kHz) | Int. |
|------------|-------------------|----------------|----------|----------|------|
| 3FP@HY     | 3FP-L             | -110           | 5.5      | 0        | 0.6  |
|            | 3FP-L             | -114           | 5.0      | 0        | 0.2  |
|            | 3FP-L             | -120           | 5.0      | 0        | 0.2  |
|            | 3FP-B/physisorbed | -123           | 5.0      | 0        | 0.8  |
|            | 3FP-B/physisorbed | -126           | 5.0      | 0        | 0.9  |
|            | 3FP-B/physisorbed | -130           | 5.0      | 0        | 1.0  |
| 3FP@HZSM-5 | 3FP-L             | -118           | 2.0      | 3.3      | 0.6  |
|            | 3FP-B/physisorbed | -124           | 2.0      | 1.8      | 0.3  |
|            | 3FP-B/physisorbed | -126           | 2.0      | 1.9      | 0.1  |
|            | 3FP-B/physisorbed | -129           | 2.0      | 1.9      | 1.0  |

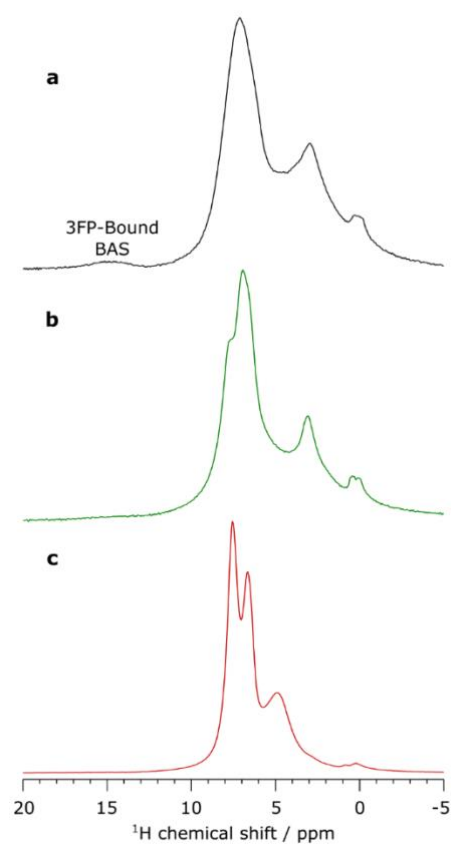

Figure S4. 20 T  $^1\text{H}$  MAS NMR spectra recorded with and without cooling using a MAS frequency of  $\sim 33$  kHz. Spectra shown are of 3FP-dosed zeolite HY at (a) 259 K (black) and (b) 293 K (green) and of (c) 3FP-dosed HZSM-5 at 259 K (red).

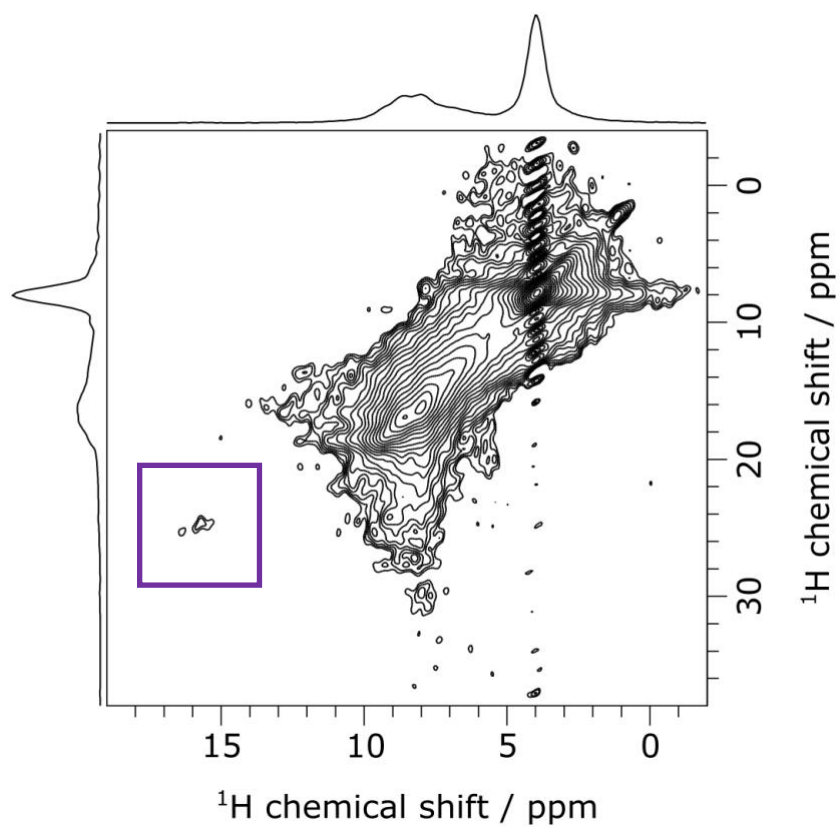

Figure S5.  $^1\text{H}$ - $^1\text{H}$  2D DQ-SQ  $S_2$  dipolar correlation MAS NMR spectrum of 3FP@HY recorded at 260 K at 16.4 T with a MAS frequency of 33.3 kHz. Skyline projections are given on both axes. The cross-peak highlighted by the purple box at (16, 22) corresponds to 3FP- $\text{H}^+$  correlations with other 3FP protons.

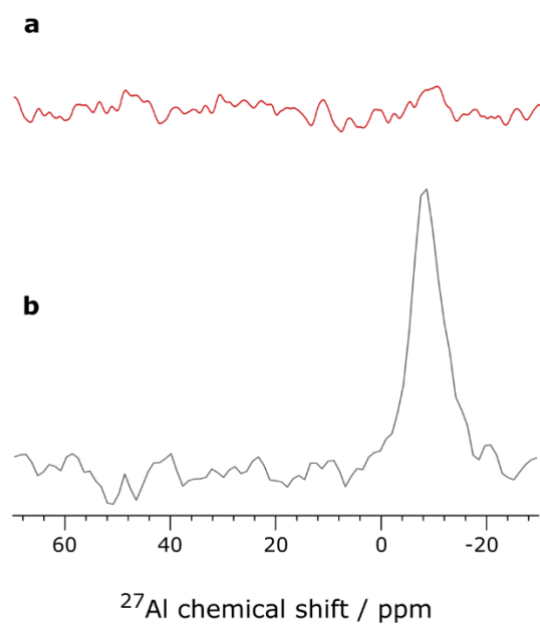

Figure S6.  $\{^{19}\text{F}\}\text{-}^{27}\text{Al}$  CP MAS spectra recorded at 20 T and 260 K with  $\sim 33$  kHz MAS frequency. Spectra shown are of (a) zeolite HZSM-5 (red) and reference sample (b)  $\text{AlF}_3$  (grey).

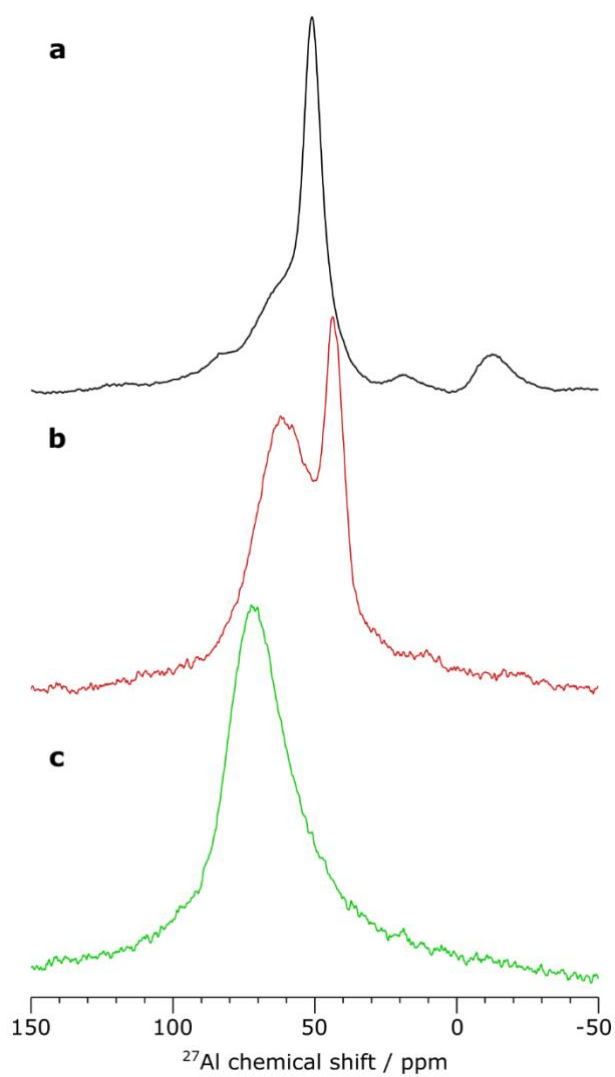

Figure S7.  $^{27}\text{Al}$  direct excitation MAS NMR spectra of 3FP-dosed zeolites (a) HY (black) and (b) HZSM-5 (red) with (c) background signal (green) recorded at 100 K and 14.1 T with 8 kHz MAS frequency.

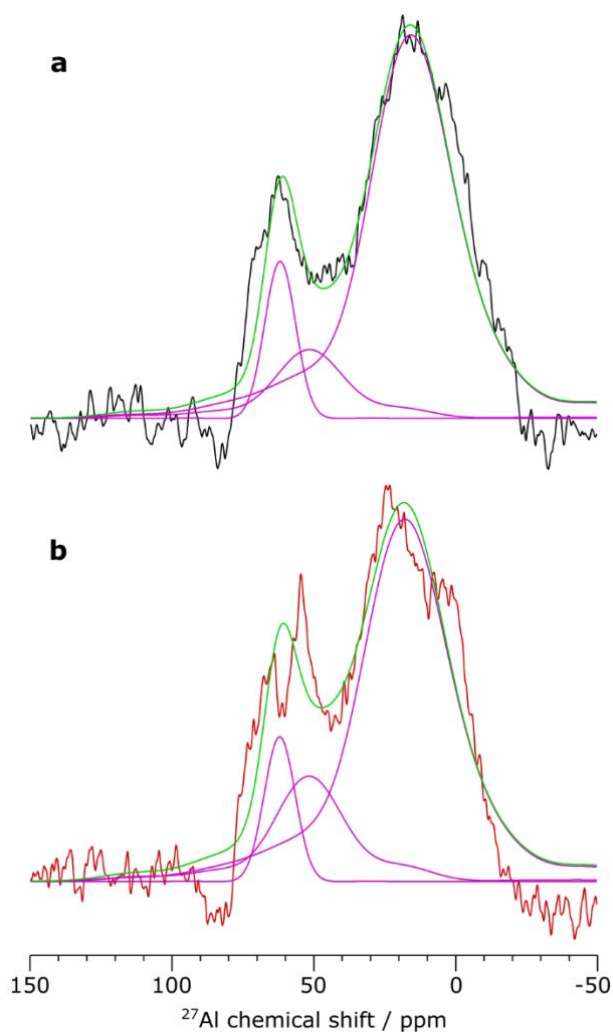

Figure S8 –  $\{^{19}\text{F}\}\text{-}^{27}\text{Al}$  CP MAS NMR spectra with associated deconvolutions (purple) and the envelope (green) of the Al sites of dosed zeolites (a) 3FP@HY (black) and (b) 3FP@HZSM-5 (red) recorded at 100 K and 14.1 T with 8 kHz MAS frequency.

Table S11. Fitting parameters for the deconvoluted resonances from Figure S8. GB = Gaussian broadening, and Int. = relative integral.  $\delta_{iso}$  is the isotropic chemical shift (units of ppm).  $C_Q$  is the quadrupolar coupling constant.

|            | Site                    | $\delta_{iso}$ (ppm) | $C_Q$ (MHz) | GB (kHz) | Int. |
|------------|-------------------------|----------------------|-------------|----------|------|
| 3FP@HY     | 3FP@Al <sup>IV</sup> -1 | 64                   | 2.9         | 2.0      | 1.0  |
|            | 3FP@Al <sup>IV</sup> -2 | 64.5                 | 6.4         | 3.5      | 1.2  |
|            | 3FP@Al <sup>V</sup>     | 30                   | 7.5         | 4.5      | 7.9  |
| 3FP@HZSM-5 | 3FP@Al <sup>IV</sup> -1 | 64                   | 2.9         | 2.0      | 1.0  |
|            | 3FP@Al <sup>IV</sup> -2 | 64.5                 | 6.4         | 3.5      | 2.0  |
|            | 3FP@Al <sup>V</sup>     | 32                   | 7.5         | 4.7      | 8.3  |



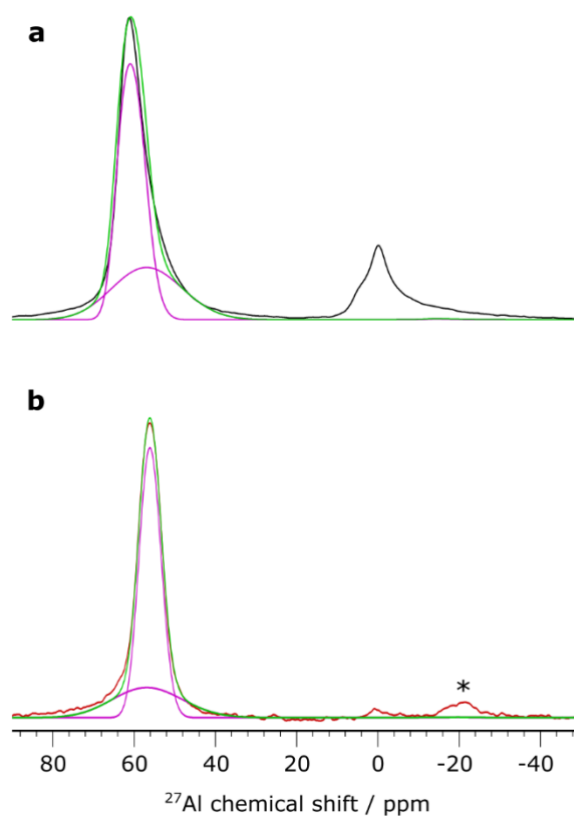

Figure S9.  $^{27}\text{Al}$  direct excitation MAS NMR spectra with associated deconvolutions (purple) and the envelope (green) of the  $\text{Al}^{\text{IV}}$  sites of zeolites (a) HY (black) and (b) HZSM-5 (red) recorded at 9.4 T with 8 kHz MAS frequency. Asterisks (\*) denote spinning side bands.

Table S12. Fitting parameters for the deconvoluted resonances from Figure S9. GB = Gaussian broadening, and Int. = relative integral.  $\delta_{iso}$  is the isotropic chemical shift (units of ppm).  $C_Q$  is the quadrupolar coupling constant

|        | Site                | $\delta_{iso}$ (ppm) | $C_Q$ (MHz) | GB (kHz) | Int. |
|--------|---------------------|----------------------|-------------|----------|------|
| HY     | Al <sup>IV</sup> -1 | 65.2                 | 2.9         | 0.6      | 1.0  |
|        | Al <sup>IV</sup> -2 | 65.5                 | 4.0         | 1.8      | 0.5  |
| HZSM-5 | Al <sup>IV</sup> -1 | 59.0                 | 2.3         | 0.6      | 1.0  |
|        | Al <sup>IV</sup> -2 | 65.5                 | 4.0         | 1.8      | 0.4  |

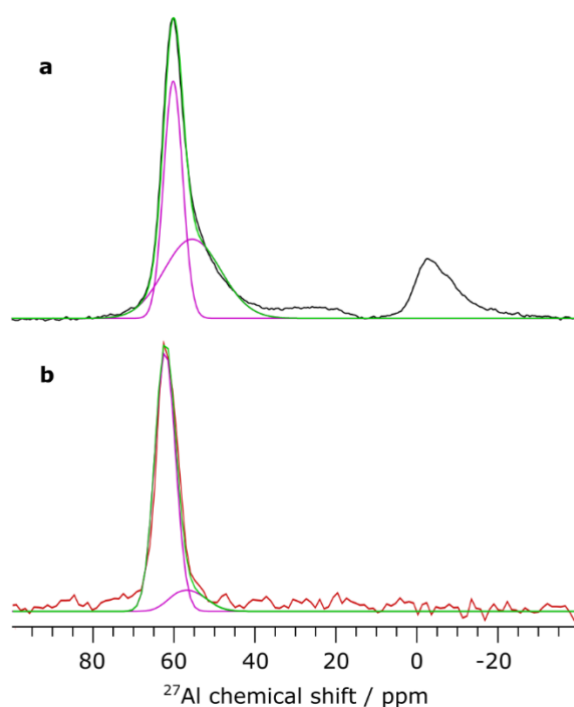

Figure S10.  $^{27}\text{Al}$  direct excitation MAS NMR spectra with associated deconvolutions (purple) and the envelope (green) of the Al<sup>IV</sup> sites of 3FP-dosed zeolites (a) HY (black) and (b) HZSM-5 (red) recorded at 20.0 T with ~33 kHz MAS frequency.

Table S13. Fitting parameters for the deconvoluted resonances from Figure S10. GB = Gaussian broadening, and Int. = relative integral.  $\delta_{iso}$  is the isotropic chemical shift (units of ppm).  $C_Q$  is the quadrupolar coupling constant.

|        | Site                | $\delta_{iso}$ (ppm) | $C_Q$ (MHz) | GB (kHz) | Int. |
|--------|---------------------|----------------------|-------------|----------|------|
| HY     | Al <sup>IV</sup> -1 | 64.2                 | 2.9         | 1100     | 1.0  |
|        | Al <sup>IV</sup> -2 | 64.6                 | 7.0         | 3000     | 1.0  |
| HZSM-5 | Al <sup>IV</sup> -1 | 63.0                 | 2.9         | 1300     | 1.0  |
|        | Al <sup>IV</sup> -2 | 63.0                 | 7.0         | 1500     | 0.1  |

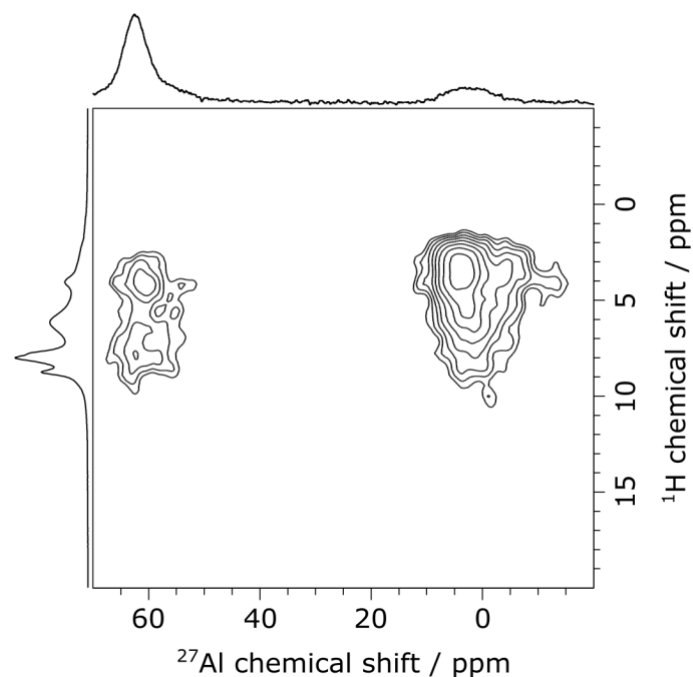

Figure S11.  $^1\text{H}$ – $^{27}\text{Al}$  2D HETCOR dipolar correlation MAS NMR spectrum of 3FP@HY recorded at ambient temperature at 16.4 T with 50 kHz MAS frequency; respective direct excitation spectra are shown on both axes for comparison.

## References

- 1 N. Wang, Q. Sun, R. Bai, X. Li, G. Guo and J. Yu, *Journal of the American Chemical Society*, 2016, **138**, 7484–7487.
- 2 K. Hadjiivanov, *Advances in Catalysis*, 2014, **57**, 99–318.
- 3 V. Zholobenko, C. Freitas, M. Jendrlin, P. Bazin, A. Travert and F. Thibault-Starzyk, *Journal of Catalysis*, 2020, **385**, 52–60.
- 4 I. B. Moroz, K. Larmier, W.-C. Liao and C. Copéret, *J. Phys. Chem. C*, 2018, **122**, 10871–10882.
